# Supplementary material for: Ruthenium core-activated platinum monolayer shell high redox activity cathodic electrocatalysts for dye-sensitized solar cells
Source: Royal Society of Chemistry journal article supplement (doi:10.1039/c3ta01547e), 2013-01-01
Supplement: c3ta01547e.pdf [file c3ta01547e.pdf]

1 **Electronic Supplementary information (ESI) for**

2

3 **Ruthenium Core-activated Platinum Monolayer Shell High Redox Activity**

4 **Cathodic Electrocatalysts for Dye-Sensitized Solar Cells**

5

6 *Tsan-Yao Chen,<sup>a,b\*</sup> Ha M. Nguyen,<sup>a</sup> Yu-Ting Liu,<sup>c</sup> Liang-Jen Fan,<sup>d</sup> Chiun-Yi Wu,<sup>a</sup>*

7 *Tzy-Jiun Mark Luo,<sup>b</sup> Chih-Hao Lee,<sup>a,d</sup> Yaw-Wen Yang,<sup>d</sup> Ten-Chin Wen,<sup>e</sup> and*

8 *Tsang-Lang Lin<sup>a\*</sup>*

9

10 Affiliations:

11 <sup>a</sup> Department of Engineering and System Science, National Tsing Hua University,

12 Hsinchu 30013, Taiwan

13 <sup>b</sup> Department of Materials Science and Engineering, North Carolina State University,

14 Raleigh, North Carolina 27695, USA

15 <sup>c</sup> Department of Civil and Environment Engineering, Duke University, Durham, North

16 Carolina 27708, USA

17 <sup>d</sup> National Synchrotron Radiation Research Center, Hsinchu 30076, Taiwan

18 <sup>e</sup> Department of Chemical Engineering, National Cheng Kung University, Tainan

19 70101, Taiwan

20

21 <sup>\*</sup>To whom correspondence should be addressed: Tsan-Yao Chen, email:

22 [chencaeser@gmail.com](mailto:chencaeser@gmail.com); Tsang-Lang Lin, email: [tllin@mx.nthu.edu.tw](mailto:tllin@mx.nthu.edu.tw); Tel:

23 +886-3-5742671 (O); +886-3-5728445 (Fax)

24

25 1. surface ratio estimation by SAXS analysis

26 Assuming that the NPs are spherical particles, the Pt utilization (which is a  
27 qualification corresponding to the specific number density of surface reaction sites for  
28 electrocatalysts,  $\psi$ ) can be estimated by equation 1:

29 
$$\langle \psi \rangle = \frac{n_{Pt\_s}}{n_{Pt\_t}} \quad (S1)$$

30 where  $n_{Pt\_s}$  and  $n_{Pt\_t}$  are the number of surface and total Pt atoms in a NPs,  
31 respectively. These two value can be represented by the  $D_{avg}$  and  $P(D)$  as follow:

32 
$$\frac{n_s}{n_t} = \frac{A_{NPs} \times P_s \times C_{Pt} \times r}{\left( \left( \frac{D_{avg}}{2} \right)^3 - \left( \frac{D_{avg}}{2} - t \right)^3 \right) \times P_L} \quad (S2)$$

33 where  $A_{NPs}$  is the average surface area of NPs and  $C_{Pt}$  is the surface Pt  
34 concentration of NPs, respectively.  $P_s$  and  $P_L$  denote the atomic packing factor of  
35 surface and bulk of NPs. The details for numerical derivation are given in the SI. The  
36  $A_{NPs}$  can be determined by an integral that taken over the whole range of particle size  
37 distribution ( $D_{min} < D < D_{max}$ , as a function of  $P(D)$ ) in equation 3:

38 
$$A_{NPs} = \int \pi D^2 P(D) dD \quad (S3)$$

39 Accordingly, since the Pt shell is ~1.5 monolayers thick the Pt utilization ( $\psi$ ) of  
40 Ru<sub>core</sub>-Pt<sub>shell</sub> NPs is determined to be ~90%, which is about 61% higher than that of  
41 Pt NPs.

42

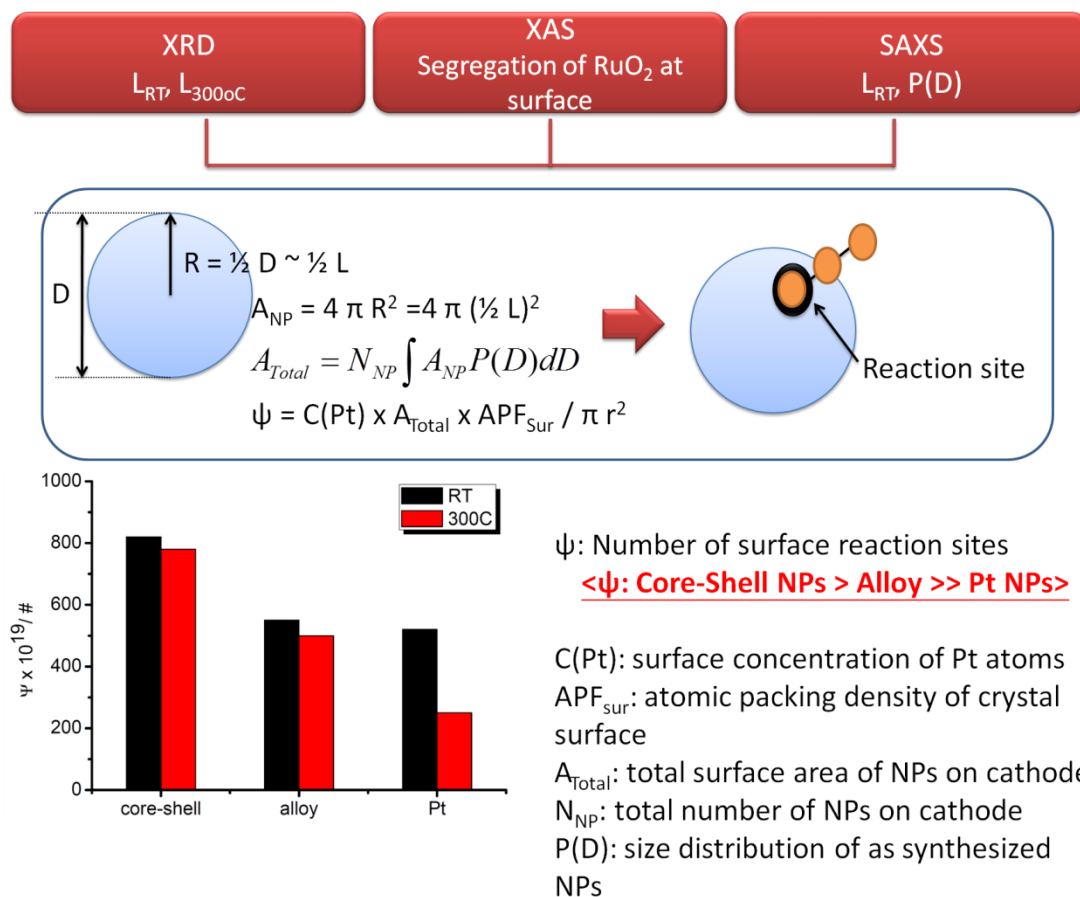

43

44 Scheme S1. Strategies and results of the specific surface ratio and active sites for the  
 45 nanoparticles combining SAXS, XRD, and XAS analyses.

46

47

## 48 2. Pt L-edges XAS analysis

49 Figure S1 compares the normalized Pt  $L_2$ -edge X-ray absorption near-edge  
 50 spectra of Pt NPs and  $\text{Ru}_{\text{core}}\text{-Pt}_{\text{shell}}$  NPs with that of Pt foil. The intensity of peak A and  
 51 the post-edge features (B and C) correspond to the extent of  $2p_{3/2}$  to  $5d_{3/2}$  charge  
 52 transition probability and the multiple photoelectron interferences, respectively. In  
 53 general, the higher the peak A intensity the higher the transition probability is  
 54 expected. On the other hand, the higher the integrated intensity across the B and C

55 area, the better local structure of the Pt domain. Hereby, the highest peak A with the  
56 smallest B and C amplitude of Ru<sub>core</sub>-Pt<sub>shell</sub> NPs are indications for the largest extent  
57 of charge donation from the 2p core level to the valence states among the three  
58 samples.

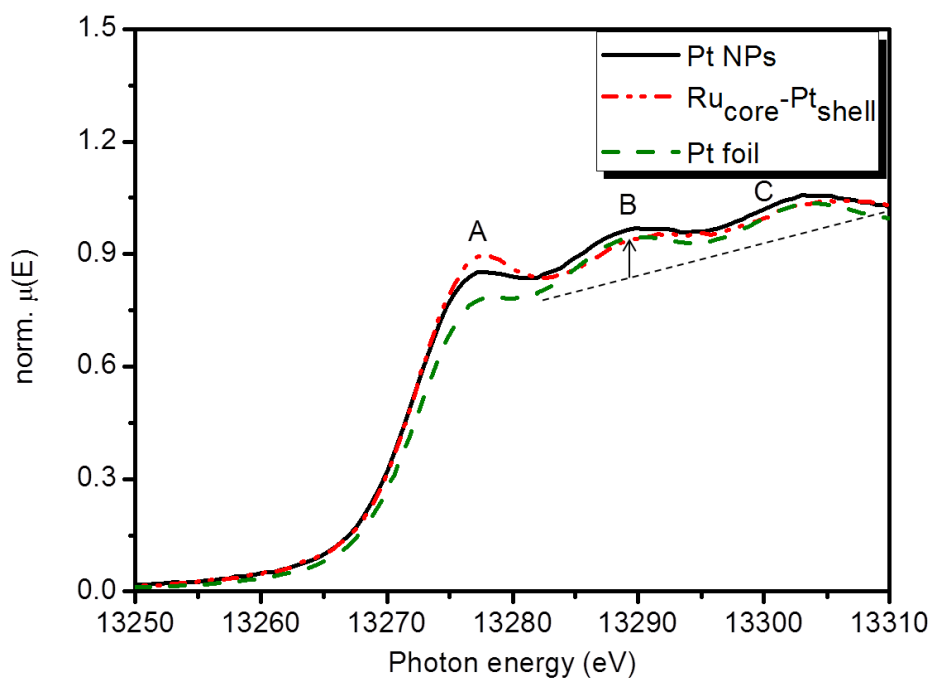

59  
60 Figure S1. Pt  $L_2$ -edge XANES spectra of Pt NPs and Ru<sub>core</sub>-Pt<sub>shell</sub> NPs compared with  
61 Pt foil.  
62

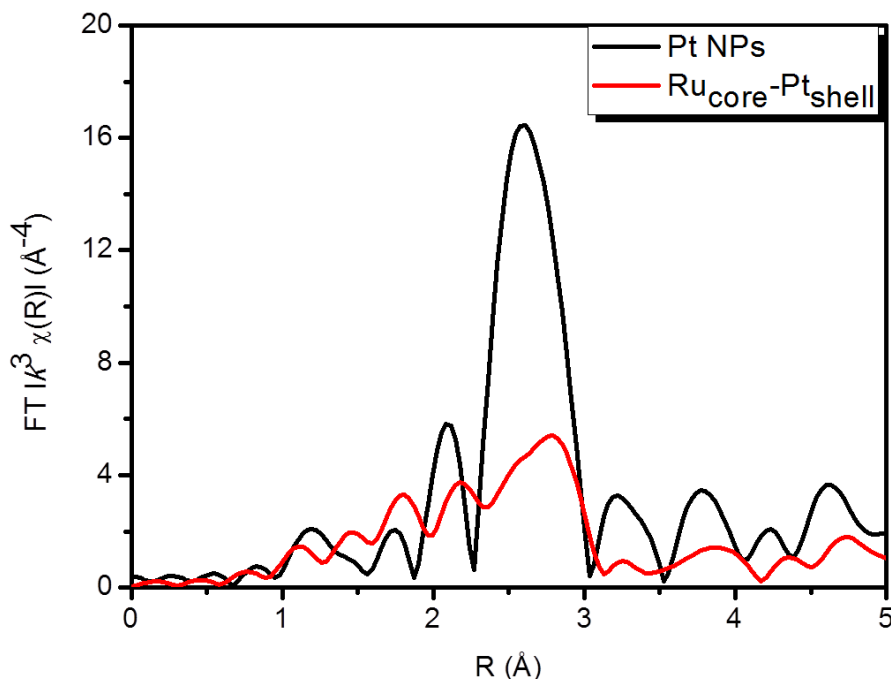

63

64 Figure S2. Pt  $L_3$ -edge EXAFS radial structure functions.

65

**Table S1. XAS obtained structure parameters of Pt and Ru<sub>core</sub>-Pt<sub>shell</sub> NPs.**

| NPs                                     | CN <sub>Pt-Pt</sub> | CN <sub>Pt-Ru</sub> | CN <sub>total</sub> | Sigma (Å <sup>2</sup> ) |
|-----------------------------------------|---------------------|---------------------|---------------------|-------------------------|
| Pt NPs                                  | 10.79               | NA                  | 10.79               | 0.008                   |
| Ru <sub>core</sub> -Pt <sub>shell</sub> | 5.05                | 0.76                | 5.81                | 0.007                   |

66 CN<sub>Pt-Pt</sub> and CN<sub>Pt-Ru</sub> denote the coordination number of Pt and Ru atoms around center

67 Pt atom, respectively, and CN<sub>total</sub> denotes the sum of the two.

68

69 According to the fitting results, the CN<sub>total</sub> of Pt atoms in Ru<sub>core</sub>-Pt<sub>shell</sub> NPs is

70 determined to be 5.81. This number is about similar to the Pt atoms at interfacets

71 edges. Presumably the Pt atoms would form a thin layer of shell structure at the

72 truncated disk-like Ru core surface. In the meantime, consider that the average

73 particle size of Pt NPs is 6.1 nm, a slight negative offset of CN<sub>total</sub> (10.79) is found

74 compared to that of theoretical prediction (10.9 - 11.0). This is possibly due to the

75 formation of surface defects and the shape merging effects.

76

77 3. UPS and XPS analysis of Pt NPs, Rucore-Ptshell NPs, PtRu alloy, and Ru NPs

78

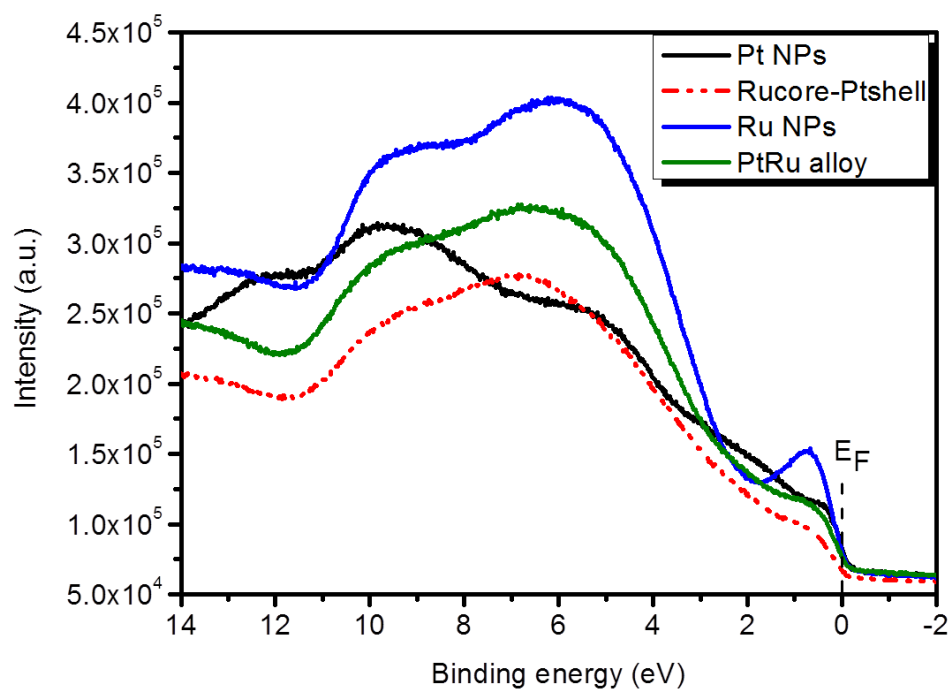

79

80 Figure S3. The VB spectra of Ru NPs and PtRu alloy compared with that of  
81 experiment NPs

82

83 5. Fabrication of DSCs module.

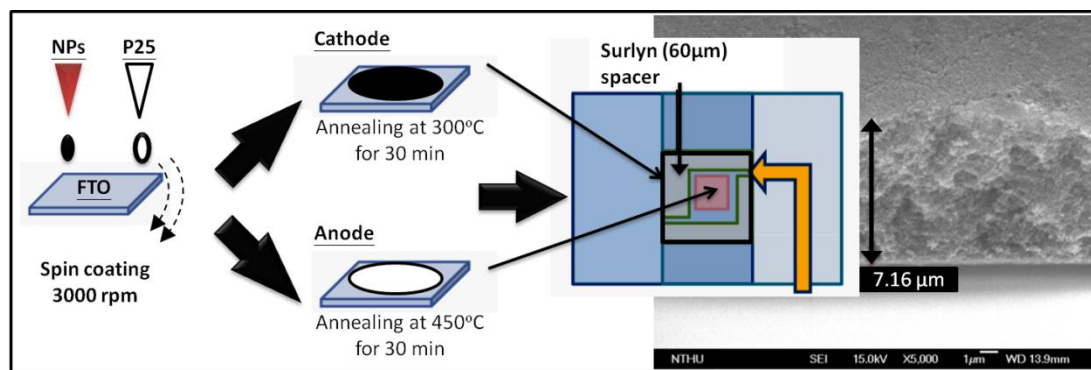

84

85 Figure S4. Schematic representation for the fabrication of NPs coated cathode and

86 anode in a DSCs module.

87
